# Supplementary material for: Peripheral and central employment of acid-sensing ion channels during early bilaterian evolution
Source: eLife. 2023 Feb 23;12:e81613. doi: 10.7554/eLife.81613 (PMC9949801; doi:10.7554/eLife.81613)
Supplement: Figure 3—source data 1. [file elife-81613-fig3-data1.xlsx]

## Sheet: Fig3A
Isodiametra pulchra ASIC
Vm (mV)	Extracellular NaCl							Extracellular KCl
-80	-0.54	-0.688	-0.31	-0.494	-4.507	-1.521	-2.573	-0.107	-0.23	-0.106	-0.101	-0.706	-0.288	-0.534
-60	-0.39	-0.55	-0.242	-0.387	-3.251	-1.354	-1.818	-0.075	-0.146	-0.041	-0.033	-0.452	-0.167	-0.399
-40	-0.315	-0.404	-0.177	-0.272	-2.782	-1.402	-1.64	0	-0.092	-0.026	0.024	-0.271	-0.138	-0.197
-20	-0.24	-0.273	-0.118	-0.19	-2.279	-1.208	-0.497	0	-0.029	0	0.019	-0.122	-0.036	-0.097
0	-0.148	-0.23	-0.125	-0.119	-1.53	-0.969	-0.455	0	0	-0.013	0	0	0	0
20	-0.084	-0.15	-0.077	-0.065	-0.947	-0.535	-0.41	0.016	0.039	0.039	0.007	0.155	0.053	0.097
40	0.089	-0.069	0	0	-0.379	-0.236	-0.354	0.062	0.065	0.08	0.054	0.277	0.06	0.185
60	0.121	0.077	0.122	0.216	0.086	-0.057	-0.058	0.052	0.085		0.146	0.435	0.103	0.203
80
	Peak current amplitude (microamperes)

## Sheet: Fig3B
Hofstenia miamia ASIC
Vm (mV)	Extracellular NaCl					Extracellular KCl
-80	-4.08	-1.188	-1.988	-12.33	-11.611	-0.492	-0.262	-0.636	-0.287
-60	-8.216	-1.749	-1.476	-10.41	-10.149	-0.271	-0.234	-0.338	-0.262
-40	-6.715	-1.442	-1.14	-8.499	-8.272	-0.199	-0.545	-0.261	-0.161	-0.147
-20	-5.402	-1.642	-1.253	-5.933	-6.561	-0.097	0	0	0	0.3
0	-3.885	-1.348	-0.972	-3.525	-4.989	0.085	0.507	0.306	0.182	0.409
20	-2.489	-1.533	-1.025	-2.392	-3.175	0.354	0.181	0.583	0.497	0.604
40	-1.367	-0.74	-0.163	-0.991	-1.702		0.574	0.776	0.581	0.573
60	-0.289	-0.294	0.231	-0.171	-0.167	0.543	0.59	1.09	0.759	1.285
80		0.253			0.793

## Sheet: Fig3D
		Normalized peak current amplitudes (I/Imax)
pH	[protons]	Isodiametra pulchra ASIC activation								Isodiametra pulchra ASIC SSD					Hofstenia miamia ASIC activation						Hofstenia miamia ASIC SSD
8.25	5.62e-09													0.960543
8	1e-08										0.348485	1	1	1
7.75	1.78e-08										1	0.656885	0.986711	0.98582
7.5	3.16e-08									1	0.35101	0.417607	0.192691	0.721948
7.25	5.62e-08									0.672414	0.388889	0.0225734	0.23588	0.536991
7	1e-07									0.165517	0	0	0	0.0690506
6.75	1.78e-07									0.113793	0	0	0	0							0.850403	0.766151	1	0.815297	0.749832	0.882049
6.5	3.16e-07									0	0	0									1	0.711978	0.768792	1	0.707186	1.00017
6.25	5.62e-07									0											0.921749	1	0.213271	0.927512	1	0.875151
6	1e-06																				0.486651	0.274092	0.1648	0.0450148	0.0409671	0.033454
5.9	1.26e-06		0.121429	0	0	0	0	0							0.00517757	0.00361151	0.0181406	0.0689007	0.0230111	0.27834
5.75	1.78e-06																				0.162255	0.25969	0.167392	0	0	0
5.6	2.51e-06	0.0661157	0.221429	0	0	0	0.324846	0.259551	0.336996						0.045796	0.106152	0.0529101	0.210976	0.206029	0.359987
5.5	3.16e-06																				0.355063	0.148654	0.105547	0	0	0
5.3	5.01e-06	0.325987	0.2	0	0	0	0.221247	0.593693	0.228938						0.130096	0.136334	0.0840262	0.512224	0.241884	0.549933
5	1e-05	0.487603		0	0	0	0.561018	0.833839	0.741758						0.161161	0.323359	0.132401	0.572747	0.502141	0.585695
4.7	2e-05	0.698806	1	0.144414	0	0	0.886743								0.284548	0.579905	0.262409	1	1	0.916329
4.3	5.01e-05	0.935721	0.875	0.5604	0.616822	0.442804	0.656716	1	0.840659						0.921316	1	0.907533	0.943922		1
4	0.0001	1	0.803571	1	1	1	1	0.825955	1						1		1
