# Supplementary material for: Peripheral and central employment of acid-sensing ion channels during early bilaterian evolution
Source: eLife. 2023 Feb 23;12:e81613. doi: 10.7554/eLife.81613 (PMC9949801; doi:10.7554/eLife.81613)
Supplement: Figure 4—source data 1. [file elife-81613-fig4-data1.xlsx]

## Sheet: Fig4A
Lingula anatina ASIC
Vm (mV)	Extracellular NaCl								Extracellular KCl
-80	-15.34	-25.815	-13.94	-15.387	-21.85	-26.97	-9.106	-11.109	-3.882	-5.378	-3.286	-4.446	-7.295	-9.792	-1.828	-1.802
-60	-11.02	-16.681	-10.03	-12.566	-16.8	-20.54	-7.196	-7.795	-2.492	-2.835	-2.182	-3.084	-6.189	-7.669	-0.965	-1.246
-40	-7.536	-11.536	-6.917	-9.246	-11.81	-15.64	-6.18	-5.783	-1.211	-0.88	-1.09	-1.465	-4.058	-4.745	-0.184	-0.384
-20	-4.648	-7.676	-4.496	-6.233	-7.585	-11.11	-3.723	-5.296	0.043	0.464	-0.167	-0.137	-1.61	-1.842	0.09	0.093
0	-2.429	-3.927	-2.63	-3.539	-4.38	-6.531	-1.932	-3.671	0.682	0.944	0.456	0.787	-0.083	0.449	0.131	0.17
20	-1.06	-1.276	-1.049	-1.518	-1.904	-2.551	-0.403	-1.952	1.324	0.977	0.83	1.059	1.07	1.958	0.1	0.159
40	0.381	1.266	0.354	0.729	0.167	0.578	0.381	-0.488	1.697	1.041	0.956	1.461	1.562	2.714	0.247	0.291
60	1.519	2.795	1.048	1.645	1.58	2.709	0.855	0.345	1.825	0.685	1.057	1.545	1.928	3.264	0.381	0.359
	Peak current amplitude (microamperes)

## Sheet: Fig4B
Phoronopsis harmeri ASIC
Vm (mV)	Extracellular NaCl					Extracellular KCl
-80	-1.417	-2.776	-1.529	-0.905	-0.663	-0.635	-1.62	-0.511	-0.809	-0.368
-60	-1.044	-1.636	-0.96	-0.688	-0.407	-0.51	-1.022	-0.161	-0.447	-0.229
-40	-0.393	-0.683	-0.359	-0.404	-0.151	-0.23	-0.604	0.187	-0.157	-0.117
-20	-0.18	-0.478	-0.207	-0.247	-0.158	-0.096	-0.339	0.446	-0.088	-0.089
0	-0.083	-0.28	0.03	-0.112	-0.124	-0.054	-0.157	0.367	-0.034	-0.023
20	-0.047	-0.161	0.214	-0.031	-0.071	0	-0.077	0.377	0.114	0.187
40	0	0	0.538	0.095	0.103	0.081	0.147	0.29	0.115	0.179
60	0.23	0.217	0.489	0.301	0.351	0.078	0.447	0.463	0.48	0.346
	Peak current amplitude (microamperes)

## Sheet: Fig4C
Ownia fusiformis ASIC
Vm (mV)	Extracellular NaCl						Extracellular KCl
-80	-48.54	-20.661	-33.17	-38.921	-53.05	-12.047	-7.964	-3.353	-3.293	-3.695	-3.22	-1.352
-60	-35.91	-15.319	-26.1	-29.199	-15.49	-6.674	-3.494	-1.669	-1.611	-1.475	-1.601	-0.533
-40	-25.87	-11.05	-19.79	-21.33	-4.222	-5.799	-1.564	-0.803	-0.745	-0.653	-0.635	-0.171
-20	-17.52	-7.607	-14.15	-14.098	-5.262	-3.38	-0.353	-0.173	-0.092	-0.13	0	-0.076
0	-10.86	-4.455	-8.963	-8.248	-3.957	-1.924	0.483	0.279	0.528	0.199	0.369	0.084
20	-5.206	-2.021	-4.599	-4.031	-1.773	-0.805	1.034	0.615	1.033	0.433	0.642	0.164
40	-1.32	-0.401	-0.588	-1.013	-0.558	-0.178	1.441	0.717	1.389	0.549	0.679	0.156
60	1.254	0.742	1.374	0.84	0.6	0.086	1.633	0.845	1.731	0.605	0.571
	Peak current amplitude (microamperes)

## Sheet: Fig4D
		Normalized peak current amplitudes (I/Imax)
pH	[protons]	Lingula anatina ASIC activation						Lingula anatina ASIC SSD				Phoronopsis harmeri ASIC activation										Phoronopsis harmeri ASIC SSD					Owenia fusiformis ASIC activation					Owenia fusiformis ASIC SSD
9	1e-09																															1	1	0.843206	0.769472	1
8.75	1.78e-09																															0.972073	0.993946	1	1	0.857628
8.5	3.16e-09																										0.183443	0.269536	0.12105	0.0953727	0.122527	0.0675424	0.051542	0.0564701	0.0663866	0.0544495
8.25	5.62e-09																										0.492008	0.546201	0.470665	0.364195	0.28348	0	-0.00369615	0.016968	-0.0254397	-0.00165097
8.2	6.31e-09							1	0.956001	0.938315	1
8	1e-08							0.782467	1	1	0.816454																0.889203	0.789547	0.431918	0.428894	0.409632	0.00155151	0.00031746	0.0238159	-0.0339589	0.00262212
7.75	1.78e-08																										1	0.816551	0.774938	0.733816	0.755981	0.000827472	0.00031746	0.00893941	-0.0284626	0.00466155
7.7	2e-08	0.00569754	0.00273644	0	0.00394856			0.615146	0.585579	0.53232	0.435798
7.5	3.16e-08																										0.874463	1	1	0.756538	0.957017
7.44	3.63e-08	0.367409	0.419587	0.094717	0.208822	0	0
7.4	3.98e-08							0.00270557	0.00513707	0	0
7.25	5.62e-08																													1	1
7.2	6.31e-08	0.968347	0.927748	0.45699	0.578463	0.32	0.277778	0.00647215	0	0	0
7	1e-07	0.901758	1	0.597362	0.706002	0.64	0.333333															0.970024	0.589644	1	1	0.658273
6.9	1.26e-07							0.00408488	0	0	0
6.75	1.78e-07																					1	1	0.392032	0.59774	0.597122
6.5	3.16e-07	1	0.959674			1	0.888889															0.377698	0.0725608	0.164409	0.0977401	0.189448
6.25	5.62e-07																					0.0179856	0.0183163	0.0106242	-0.128249	0.194245
6	1e-06			1	1	0.92	1															0.059952	0.0602325	0.0135458	-0.126554	0.21223
5.9	1.26e-06											0.0248902	0.0994295	0.0231523	0.0141844	0.0165931	0.0350477	0.0170208	0.0284183	0.0202041	0.0255789
5.75	1.78e-06
5.6	2.51e-06											0.0541728
5.5	3.16e-06
5.3	5.01e-06											0.0878477		0.589492	0.260939	0.529457	0.396841	0.550065	0.456479	0.558293	0.408621
5	1e-05											0.158126			0.645658	0.813822	0.480027	0.732246	0.792952	0.874343	0.909298
4.7	2e-05											0.199122	0.689487	0.550312	0.558544	0.893743	0.708471	1	1	0.99464	0.956608
4.3	5.01e-05											0.729136	0.774246	0.724251					0.808542	0.897639	0.749697
4	0.0001											1	0.679707	1	0.960525	0.940478	1	0.9264	0.948847	1	1
3.7	0.0002												0.99348		1	1	0.870197
3.3	0.000501
