# Supplementary material for: Peripheral and central employment of acid-sensing ion channels during early bilaterian evolution
Source: eLife. 2023 Feb 23;12:e81613. doi: 10.7554/eLife.81613 (PMC9949801; doi:10.7554/eLife.81613)
Supplement: Figure 5—source data 1. [file elife-81613-fig5-data1.xlsx]

## Sheet: Fig5C
		Normalized peak current amplitudes (I/Imax)
pH	[protons]	Schizocardium californicum ASIC activation			Schizocardium californicum ASIC SSD
8	1e-08				1	1	1	1
7.75	1.78e-08				0.708415	0.527442	1.33083	1.15465
7.5	3.16e-08				0.769269	0.174931	1.24093	0.559203
7.25	5.62e-08				0.942293	0.0792553	0.375518	0.400547
7	1e-07				0.0449273	0.0133816	0.0505181	0.0086948
6.75	1.78e-07				0	0	0	0
6.5	3.16e-07				0	0	0	0
5.9	1.26e-06	0	0	0
5.6	2.51e-06	0.0324544	0.459685	0.172312
5.3	5.01e-06	0.443742	0.436423
5	1e-05	0.699797	0.503985	0.579424
4.7	2e-05	0.603627	0.314643
4.3	5.01e-05	1.37311	0.905561	0.729224
4	0.0001	1	1	1

## Sheet: Fig5D
Schizocardium californicum ASIC
Vm (mV)	Sodium					Potassium
-80	-13.881	-6.992	-5.074	-14.89	-6.13	-7.042	-0.515	-0.178	-7.325	-15.81
-60	-7.643	-6.17	0	-11.47	-5.355	-7.601	-3.343	-0.119	-4.451	-10.35
-40	-10.46	-4.38	-4.146	-7.594	-13.84	-4.244	-1.351	-0.041	-2.624	-7.676
-20	-7.391	-2.325	-1.687	-5.25	-8.92	-0.486	-0.546	-0.018	-1.241	-4.849
0	-3.433	-1.07	-0.572	-2.973	-5.168	1.333	0	0.019	-0.27	-2.327
20	-0.679	-0.175	-0.043	-0.799	-0.813	1.806	0.33	0.023	0.132	-0.064
40	2.121	0.231	0.399	0.754	0.148	2.559	0.428	0.047	0.382	0.976
60	3.322	0.386	0.497	1.475	1.262	2.639	0	0.044	0.438	1.412
	Peak current amplitude (microamperes)
