# Supplementary material for: Peripheral and central employment of acid-sensing ion channels during early bilaterian evolution
Source: eLife. 2023 Feb 23;12:e81613. doi: 10.7554/eLife.81613 (PMC9949801; doi:10.7554/eLife.81613)
Supplement: Table 1—source data 1. [file elife-81613-table1-data1.xlsx]

## Sheet: Imax (Low Ca++)
Maximal current amplitudes for the transient peaks (activating pH 4, but 6 for Lingula anatina and 7 for Owenia fusiformis)
Isodiametra pulchra	Hofstenia miamia	Lingula anatina	Phoronopsis harmeri	Owenia fusiformis	Schizocardium californicum
1.089	13.71	13.799	0.683	26.53	20.21
0.28	7.753	17.728	1.227	25.81	31.43
1.101	7.938	8.588	3.369	14.56	38.87
0.214	5.849	6.834	7.473	27.32	20.8
0.271	5.606	10.378	6.569	26.54	25.78
1.139	2.964		11.84	9.655	17.53
1.649			8.519	18.39
			6.158
			9.701
			14.04

## Sheet: Imax
Maximal current amplitudes for the transient peaks in Low-Ca2+ bath solution (activating pH 4, but 6 for Lingula anatina and 7 for Owenia fusiformis)
Isodiametra pulchra	Hofstenia miamia	Lingula anatina	Phoronopsis harmeri	Owenia fusiformis	Schizocardium californicum
3.411	53.12	28.58	11.21	58.86	11.51
3.987	65.18	49.02	10.67	96.62	4.753
1.067	23.73	25.6	11.81	50.91	7.533
2.992	73.7	43.59	10.32	86.93
6.38	14.59	28.57	8.152	31.48
		17.46		32.79

## Sheet: pH50 (Low Ca++)
		Normalized peak current amplitudes (I/Imax)
pH	[protons]	Isodiametra pulchra					Hofstenia miamia					Lingula anatina						Phoronopsis harmeri					Owenia fusiformis						Schizocardium californicum
8.5	3.16e-09																						0.362742	0.251656	0.196358	0.350175	0.30736	0.327823
8.25	5.62e-09																						0.49599	0.618066	0.684621	0.661202	0.485086	0.631611
8	1e-08											0	0	0	0	0	0.00790378						0.608444	0.763361	0.771996	0.810319	0.72593	0.715305
7.75	1.78e-08																						1	1	1	1	0.961342	0.962911
7.7	2e-08											0.026627	0.128213	0.00768302	0.00621702	0.147882	0.141065
7.5	3.16e-08																						0.733452	0.980709	0.97627	0.907875	1	1
7.44	3.63e-08											0.693842	0.547124	0.826629	0.669649	0.716486	0.788087
7.2	6.31e-08											0.984255	1	1.02977	1	0.960098	1
7.25	5.62e-08																						0.830598	0.989806	0.979237	0.861053	0.853213	0.931526
7	1e-07											0.943667	0.581395	0.965004	0.761413	0.981799	0.986254						0.962742	0.751428	0.851003	0.704941	0.596487	0.865705
6.75	1.78e-07
6.5	3.16e-07											1	0.799062	1	0.940124	1	0.996564
6.25	5.62e-07
6	1e-06											0.996151	0.697878	0.952936	0.852948	0.945397	0.979381
5.9	1.26e-06	0.0358246	0.271802	0.300985	0.224933	0.274156	0.191264	0.175859	0.132932	0.155195	0.156513							0.291258	0.226148	0.313124	0.279124	0.182164							0.369898	0.540476	0.286894	0.375667	0.490824	0.385739
5.75	1.78e-06
5.6	2.51e-06	0.445337	0.900841	0.64135	0.449198	0.432364	0.549299	0.587408	0.491826	0.420876								0.66289	0.662699	0.530567	0.647315								0.724358	0.828518	0.894798	0.806038	0.565897	0.689276
5.5	3.16e-06
5.3	5.01e-06		0.471005	0.35865	0.612634	0.715226	0.947435	0.703634	0.614983	0.807886	0.492565							0.468421	0.633271	0.862828	0.698003	0.356109
5	1e-05	1.05343	1.57592		0.878008	0.805904	0.817472	1	0.770161	0.779107	0.864044							1	0.990628	0.613463	1	0.532875							1	0.985522	1	0.731962	0.741261	1
4.7	2e-05	0.517295	0.943338	0.894515	0.892045	1.02973	0.696903	0.827164	0.707803	1	0.727746							0.791169	0.928116	1	0.761679	0.618621							0.667904	0.781837	0.983097	1	0.766014	0.898175
4.3	5.01e-05	0.901174	1.76494	1.5007	1	1.35485	0.82681	0.959161	0.892433	0.869947	0.997739							0.946476	1	0.576969	0.716903	0.865432							0.984217	0.359002	0.76608	0.986348	0.874258	0.832002
4	0.0001	1	1	1	0.394051	1	1	0.847245	1	0.778307	1							0.672168	0.643861	0.793649	0.659721	1							0.910791	1	0.637105	0.85978	1	0.858928

## Sheet: T50
Time to half-maximal desensitization (half the time (seconds) from peak transient current to sustained current).
Isodiametra pulchra	Hofstenia miamia	Lingula anatina	Phoronopsis harmeri	Owenia fusiformis	Schizocardium californicum
0.115	0.231	9.953	0.209	0.115	0.171
0.119	0.207	9.146	0.261	0.137	0.142
0.072	0.195	9.738	0.271	0.153	0.21
0.06	0.118	7.849	0.173	0.181	0.184
0.152	0.185	8.12			0.121
0.055	0.159				0.242

## Sheet: Isus-Itrans
Relation between current amplitudes for sustained and transient peaks (Isus/Itra)
Isodiametra pulchra			Hofstenia miamia			Lingula anatina			Phoronopsis harmeri			Owenia fusiformis			Schizocardium californicum
Isus	Itra	Isus/Itra	Isus	Itra	Isus/Itra	Isus	Itra	Isus/Itra	Isus	Itra	Isus/Itra	Isus	Itra	Isus/Itra	Isus	Itra	Isus/Itra
0.164	0.865	0.19	2.137	11.942	0.179	0.397	11.956	0.033	0.509	16.367	0.031	0.061	40.838	0.001	0.085	12.196	0.007
0.142	0.383	0.371	1.746	8.248	0.212	0.205	17.854	0.011	0.509	10.642	0.048	0.106	34.696	0.003	0.313	32.36	0.01
0.139	0.358	0.388	1.693	7.29	0.232	0.054	10.161	0.005	0.245	8.951	0.027	0.336	27.723	0.012	0.098	15.817	0.006
0.075	0.385	0.195	2.112	25.549	0.083	0.168	7.83	0.021	0.2	9.56	0.021	0.059	42.363	0.001	0.102	20.805	0.005
0.138	0.831	0.166	1.761	18.239	0.097	0.29	20.176	0.014							0.04	19.364	0.002
0.152	0.928	0.164	1.446	5.63	0.257										0.082	11.946	0.007
